# Supplementary material for: One and Multiple Bonds Interatomic Spin-Spin Coupling inη6-Cymene Ru(II) of 3,5-Dimethyl-, 3,5-Dicarboxylic-, and 5-Phenyl-pyrazole Derivatives
Source: Hindawi journal article supplement (doi:10.1155/2015/832045), 2015-01-01
Supplement: f1 [file 832045.f1.doc]

Table S1: The Ramsey terms and the spin-spin J-coupling interaction of selected bonds in complexes of pyrazole derivatives

|  |  | **FC** | **SD** | **PSO** | **DSO** | **J-Coup** |
| --- | --- | --- | --- | --- | --- | --- |
| dmpzCym | Ru-C | -9.117 | 0.116 | -1.189 | -0.040 | -10.229 |
|  | “ | -8.343 | -0.110 | -1.662 | -0.038 | -10.152 |
|  | “ | -8.408 | 0.133 | -2.335 | -0.036 | -10.647 |
|  | “ | -8.325 | -0.159 | -1.473 | -0.038 | -9.995 |
|  | “ | -8.294 | 0.150 | -1.526 | -0.036 | -9.705 |
|  | “ | -8.000 | -0.046 | -1.547 | -0.038 | -9.630 |
|  | Ru-N | -12.469 | -0.109 | -0.826 | -0.015 | -13.418 |
|  | Ru1-Cl | -2.596 | -1.883 | -20.426 | -0.010 | -24.916 |
|  | Ru1-Cl | -2.776 | -1.491 | -16.418 | -0.010 | -20.695 |
|  | Hc..Hc | 5.137 | 0.108 | -0.337 | 1.216 | 6.124 |
|  | Hc..Hc | 5.562 | 0.067 | -0.396 | 1.153 | 6.385 |
|  | N-N* | -0.480 | -0.041 | -0.964 | 0.042 | -1.443 |
|  | C-H | 181.118 | 0.294 | 0.339 | 1.061 | 182.811 |
|  | N-H | 72.187 | 0.117 | 0.488 | 0.497 | 73.288 |
| dmpzWCym | Ru-C | -6.649 | -0.084 | -1.410 | -0.037 | -8.180 |
|  | “ | -11.121 | -0.139 | -2.511 | -0.037 | -13.808 |
|  | “ | -7.107 | 0.035 | -2.040 | -0.035 | -9.147 |
|  | “ | -9.986 | -0.278 | -2.505 | -0.037 | -12.805 |
|  | “ | -8.681 | -0.154 | -2.119 | -0.035 | -10.989 |
|  | “ | -7.174 | 0.079 | -1.540 | -0.035 | -8.671 |
|  | Ru-N | -13.499 | -0.121 | -1.217 | -0.014 | -14.851 |
|  | Ru1-Cl | -1.856 | -1.440 | -15.981 | -0.010 | -19.288 |
|  | Ru1-O | 3.510 | 0.582 | 3.786 | 0.017 | 7.894 |
|  | Hc..Hc | 5.791 | 0.073 | -0.410 | 1.177 | 6.631 |
|  | Hc..Hc | 5.448 | 0.101 | -0.274 | 0.970 | 6.245 |
|  | N-N* | -0.607 | -0.052 | -0.819 | 0.041 | -1.436 |
|  | C-H | 187.079 | 0.298 | 0.172 | 1.045 | 188.593 |
|  | N-H | 73.903 | 0.122 | 0.722 | 0.464 | 75.212 |
| dcpzCym | Ru-C | -9.937 | -0.490 | -1.668 | -0.038 | -12.133 |
|  | “ | -11.360 | 0.081 | -2.116 | -0.038 | -13.433 |
|  | “ | -7.166 | 0.292 | -1.442 | -0.037 | -8.353 |
|  | “ | -8.137 | -0.169 | -1.668 | -0.039 | -10.014 |
|  | “ | -8.345 | -0.267 | -1.940 | -0.038 | -10.590 |
|  | “ | -8.013 | 0.282 | -2.414 | -0.037 | -10.181 |
|  | Ru-N | -9.630 | -0.033 | -0.136 | -0.014 | -9.813 |
|  | Ru1-Cl | -3.026 | -1.541 | -16.431 | -0.010 | -21.008 |
|  | Ru1-Cl3 | -2.621 | -1.710 | -19.150 | -0.011 | -23.491 |
|  | Hc..Hc | 5.721 | 0.076 | -0.305 | 1.171 | 6.663 |
|  | Hc..Hc | 5.242 | 0.118 | -0.633 | 1.532 | 6.259 |
|  | N-N* | 0.124 | 0.054 | -1.513 | 0.042 | -1.293 |
|  | C-H | 195.415 | 0.377 | -0.284 | 1.158 | 196.667 |
|  | N-H | 72.418 | 0.185 | 0.317 | 0.541 | 73.462 |
| dcpzWCym | Ru-C | -11.005 | 0.030 | -2.842 | -0.038 | -13.854 |
|  | “ | -6.883 | -0.352 | -1.746 | -0.037 | -9.019 |
|  | “ | -9.148 | -0.470 | -2.412 | -0.038 | -12.067 |
|  | “ | -8.728 | 0.151 | -2.266 | -0.036 | -10.880 |
|  | “ | -7.149 | 0.287 | -1.584 | -0.036 | -8.483 |
|  | “ | -9.150 | -0.450 | -2.210 | -0.036 | -11.846 |
|  | Ru-N | -12.214 | -0.076 | -0.173 | -0.014 | -12.478 |
|  | Ru1-Cl | -2.179 | -1.232 | -15.751 | -0.010 | -19.173 |
|  | Ru1-O | 3.184 | 0.367 | 3.963 | 0.017 | 7.530 |
|  | Hc..Hc | 5.841 | 0.089 | -0.579 | 1.443 | 6.795 |
|  | Hc..Hc | 5.541 | 0.100 | -0.290 | 1.019 | 6.370 |
|  | N-N* | -0.212 | -0.041 | -1.156 | 0.042 | -1.366 |
|  | C-H | 201.190 | 0.399 | -0.324 | 1.110 | 202.375 |
|  | N-H | 75.492 | 0.124 | 0.650 | 0.477 | 76.742 |
| bdmpzmCym | Ru-C | -9.232 | 0.403 | -1.861 | -0.038 | -10.728 |
|  | “ | -6.230 | -0.337 | -1.598 | -0.039 | -8.204 |
|  | “ | -8.397 | -0.454 | -1.742 | -0.039 | -10.632 |
|  | “ | -8.288 | 0.430 | -1.914 | -0.038 | -9.809 |
|  | “ | -7.849 | 0.495 | -1.576 | -0.037 | -8.967 |
|  | “ | -8.394 | -0.390 | -1.620 | -0.039 | -10.443 |
|  | Ru-N | -12.328 | -0.103 | -0.923 | -0.015 | -13.370 |
|  | Ru1-N | -11.913 | -0.108 | -0.881 | -0.015 | -12.917 |
|  | Ru-Cl | -1.677 | -2.260 | -22.433 | -0.011 | -26.381 |
|  | Hc..Hc | 5.557 | 0.091 | -0.482 | 1.240 | 6.406 |
|  | Hc..Hc | 5.702 | 0.080 | -0.466 | 1.211 | 6.527 |
|  | N..N | -0.435 | 0.000 | -0.004 | 0.014 | -0.425 |
|  | N-N* | -0.792 | -0.046 | -0.857 | 0.046 | -1.649 |
|  | N-N* | -0.745 | -0.046 | -0.857 | 0.047 | -1.602 |
|  | C-H | 187.439 | 0.293 | 0.132 | 1.077 | 188.943 |
|  | C-H | 187.430 | 0.294 | 0.131 | 1.077 | 188.932 |
| bdmpzmWCym | Ru-C | -7.955 | 0.308 | -2.034 | -0.036 | -9.717 |
|  | “ | -5.394 | -0.485 | -2.296 | -0.037 | -8.213 |
|  | “ | -8.047 | 0.342 | -1.956 | -0.036 | -9.697 |
|  | “ | -7.984 | -0.516 | -2.063 | -0.037 | -10.600 |
|  | “ | -8.390 | -0.531 | -2.127 | -0.037 | -11.085 |
|  | “ | -12.038 | 0.283 | -2.817 | -0.038 | -14.610 |
|  | Ru-N | -12.303 | -0.092 | -1.168 | -0.015 | -13.577 |
|  | Ru1-N | -12.482 | -0.097 | -1.327 | -0.015 | -13.921 |
|  | Ru-O | 5.988 | 0.579 | 3.705 | 0.019 | 10.290 |
|  | Hc..Hc | 6.010 | 0.077 | -0.489 | 1.183 | 6.780 |
|  | Hc..Hc | 5.777 | 0.080 | -0.446 | 1.122 | 6.532 |
|  | N..N | -0.396 | 0.000 | -0.004 | 0.014 | -0.385 |
|  | N-N* | -0.668 | -0.043 | -0.816 | 0.046 | -1.480 |
|  | N-N* | -0.650 | -0.047 | -0.794 | 0.046 | -1.444 |
|  | C-H | 192.328 | 0.307 | 0.013 | 1.057 | 193.705 |
|  | C-H | 192.488 | 0.309 | 0.024 | 1.053 | 193.874 |
| bdmpzaCym | Ru-C | -9.668 | 0.322 | -1.917 | -0.039 | -11.302 |
|  | “ | -6.010 | -0.285 | -1.619 | -0.039 | -7.953 |
|  | “ | -8.410 | -0.455 | -1.820 | -0.039 | -10.725 |
|  | “ | -7.922 | 0.410 | -2.008 | -0.038 | -9.557 |
|  | “ | -7.481 | 0.459 | -1.577 | -0.038 | -8.637 |
|  | “ | -8.486 | -0.338 | -1.609 | -0.039 | -10.472 |
|  | Ru-N | -12.371 | -0.103 | -1.011 | -0.016 | -13.501 |
|  | Ru1-N | -11.362 | -0.105 | -0.830 | -0.015 | -12.313 |
|  | Ru-Cl | -1.816 | -2.295 | -22.844 | -0.012 | -26.967 |
|  | Hc..Hc | 5.808 | 0.078 | -0.490 | 1.251 | 6.647 |
|  | Hc..Hc | 5.443 | 0.095 | -0.488 | 1.245 | 6.295 |
|  | N..N | -0.346 | -0.002 | -0.004 | 0.014 | -0.338 |
|  | N-N* | -0.810 | -0.040 | -0.777 | 0.048 | -1.579 |
|  | N-N* | -0.966 | -0.041 | -0.819 | 0.047 | -1.779 |
|  | C-H | 186.754 | 0.289 | 0.121 | 1.104 | 188.268 |
|  | C-H | 188.551 | 0.291 | 0.068 | 1.101 | 190.010 |
| bdmpzaWCym | Ru-C | -7.708 | 0.348 | -2.013 | -0.036 | -9.409 |
|  | “ | -8.510 | -0.503 | -2.209 | -0.038 | -11.260 |
|  | “ | -11.243 | 0.319 | -2.788 | -0.038 | -13.750 |
|  | “ | -7.993 | -0.536 | -2.059 | -0.038 | -10.626 |
|  | “ | -8.559 | 0.251 | -2.161 | -0.037 | -10.505 |
|  | “ | -5.417 | -0.476 | -2.277 | -0.038 | -8.208 |
|  | Ru-N | -12.040 | -0.096 | -1.128 | -0.015 | -13.279 |
|  | Ru1-N | -12.344 | -0.099 | -1.411 | -0.015 | -13.869 |
|  | Ru-O | 6.060 | 0.575 | 3.887 | 0.019 | 10.540 |
|  | Hc..Hc | 5.846 | 0.083 | -0.484 | 1.179 | 6.624 |
|  | Hc..Hc | 5.968 | 0.075 | -0.472 | 1.155 | 6.727 |
|  | N..N | -0.293 | -0.003 | -0.003 | 0.014 | -0.284 |
|  | N-N* | -0.783 | -0.033 | -0.790 | 0.047 | -1.558 |
|  | N-N* | -0.640 | -0.038 | -0.749 | 0.047 | -1.379 |
|  | C-H | 191.707 | 0.304 | 0.021 | 1.079 | 193.111 |
|  | C-H | 191.908 | 0.302 | -0.006 | 1.084 | 193.288 |
| bphpzaCym | Ru-C | -8.123 | 0.382 | -2.145 | -0.041 | -9.927 |
|  | “ | -5.117 | -0.388 | -1.831 | -0.041 | -7.377 |
|  | “ | -7.404 | 0.386 | -2.051 | -0.041 | -9.110 |
|  | “ | -6.561 | 0.481 | -1.602 | -0.039 | -7.721 |
|  | “ | -6.759 | -0.457 | -1.804 | -0.041 | -9.061 |
|  | “ | -6.511 | -0.479 | -1.812 | -0.041 | -8.844 |
|  | Ru-N | -11.941 | -0.094 | -0.648 | -0.016 | -12.698 |
|  | Ru1-N | -10.970 | -0.095 | -0.673 | -0.016 | -11.754 |
|  | Ru-Cl | -2.891 | -2.224 | -22.314 | -0.012 | -27.442 |
|  | Hc..Hc | 5.602 | 0.094 | -0.772 | 1.686 | 6.610 |
|  | Hc..Hc | 5.628 | 0.096 | -0.717 | 1.621 | 6.627 |
|  | N..N | -0.381 | 0.000 | -0.005 | 0.013 | -0.373 |
|  | N-N* | -1.097 | -0.033 | -0.961 | 0.047 | -2.043 |
|  | N-N* | -1.246 | -0.037 | -0.931 | 0.047 | -2.167 |
|  | C-H | 186.927 | 0.313 | -0.040 | 1.085 | 188.285 |
|  | C-H | 186.778 | 0.310 | -0.029 | 1.076 | 188.134 |
|  | Hz..Hz | 3.169 | -0.112 | 0.327 | -0.498 | 2.885 |
|  | Hz..Hz | 3.191 | -0.114 | 0.335 | -0.517 | 2.895 |
| bphpzaWCym | Ru-C | -8.399 | -0.531 | -2.238 | -0.040 | -11.207 |
|  | “ | -9.888 | 0.465 | -2.506 | -0.039 | -11.968 |
|  | “ | -8.584 | -0.505 | -2.362 | -0.040 | -11.491 |
|  | “ | -9.310 | 0.284 | -2.155 | -0.039 | -11.220 |
|  | “ | -5.141 | -0.483 | -1.884 | -0.039 | -7.547 |
|  | “ | -8.919 | 0.202 | -2.240 | -0.039 | -10.995 |
|  | Ru-N | -11.472 | -0.111 | -1.009 | -0.015 | -12.607 |
|  | Ru1-N | -11.471 | -0.115 | -0.998 | -0.015 | -12.599 |
|  | Ru-O | 8.697 | 0.513 | 6.298 | 0.022 | 15.530 |
|  | Hc..Hc | 5.802 | 0.084 | -0.589 | 1.333 | 6.631 |
|  | Hc..Hc | 6.058 | 0.077 | -0.640 | 1.400 | 6.895 |
|  | N..N | -0.353 | -0.005 | -0.003 | 0.017 | -0.343 |
|  | N-N* | -0.879 | -0.034 | -0.911 | 0.047 | -1.778 |
|  | N-N* | -0.854 | -0.034 | -0.918 | 0.047 | -1.759 |
|  | C-H | 198.039 | 0.336 | -0.114 | 1.060 | 199.320 |
|  | C-H | 197.978 | 0.336 | -0.114 | 1.057 | 199.256 |
|  | Hz..Hz | 3.313 | -0.111 | 0.323 | -0.503 | 3.023 |
|  | Hz..Hz | 3.309 | -0.110 | 0.325 | -0.507 | 3.016 |
| bdmpzpyCym | Ru-C | -7.387 | -0.220 | -1.539 | -0.038 | -9.185 |
|  | “ | -8.130 | 0.165 | -1.388 | -0.037 | -9.390 |
|  | “ | -5.751 | -0.249 | -1.445 | -0.038 | -7.483 |
|  | “ | -5.488 | 0.103 | -1.609 | -0.039 | -7.033 |
|  | “ | -8.409 | -0.158 | -2.576 | -0.038 | -11.181 |
|  | “ | -8.169 | 0.118 | -2.676 | -0.038 | -10.765 |
|  | Ru-N | -12.921 | 0.016 | -0.943 | -0.015 | -13.862 |
|  | Ru1-N | -12.568 | 0.038 | -0.865 | -0.015 | -13.410 |
|  | Ru1-Np | -10.687 | -0.156 | -0.574 | -0.016 | -11.433 |
|  | Hc..Hc | 6.458 | 0.059 | -0.487 | 1.120 | 7.151 |
|  | Hc..Hc | 5.462 | 0.095 | -0.489 | 1.202 | 6.269 |
|  | N..N | -0.052 | -0.007 | -0.015 | 0.006 | -0.068 |
|  | N..Np | -0.330 | -0.003 | -0.014 | 0.023 | -0.324 |
|  | N..Np | -0.368 | -0.004 | -0.014 | 0.023 | -0.363 |
|  | N-N* | -1.107 | 0.030 | -0.640 | 0.047 | -1.670 |
|  | N-N* | -1.203 | 0.029 | -0.657 | 0.047 | -1.783 |
|  | C-H | 190.974 | 0.308 | -0.003 | 1.060 | 192.338 |
|  | C-H | 193.889 | 0.315 | -0.053 | 1.062 | 195.214 |
|  | Hc..Hc | 5.477 | 0.095 | -0.433 | 1.124 | 6.263 |
|  | Hc..Hc | 6.529 | 0.059 | -0.379 | 0.988 | 7.197 |
|  | N..N | -0.020 | -0.004 | -0.011 | 0.004 | -0.031 |
|  | N..Np | -0.355 | 0.001 | -0.016 | 0.021 | -0.349 |
|  | N..Np | -0.344 | 0.001 | -0.015 | 0.021 | -0.337 |
|  | N-N* | -1.018 | 0.020 | -0.832 | 0.045 | -1.785 |
|  | N-N* | -1.065 | 0.020 | -0.827 | 0.045 | -1.828 |
|  | C-H | 214.986 | 0.403 | -0.268 | 1.085 | 216.206 |
|  | C-H | 198.438 | 0.372 | -0.066 | 0.906 | 199.651 |
|  | Hz..Hz | 3.653 | -0.130 | 0.495 | -0.772 | 3.246 |
|  | Hz..Hz | 3.672 | -0.129 | 0.520 | -0.807 | 3.255 |

Hc and Hc represent the proton from cymene and pyrazole respectively, N and Np stands for coordinated nitrogen from pyrazole and pyridine unit of the ligands while N* represent the nitrogen atom of pyrazole which is not coordinated.
